# Supplementary material for: A data-driven artificial neural network approach to predict make-up exam participation in higher education
Source: PeerJ journal article supplement (doi:10.7717/peerj-cs.3394), 2025-12-02
Supplement: MakeupExamParticipation_DATASET.xlsx [file MakeupExamParticipation_DATASET.xlsx]

## Sheet: Sayfa1
ID	MS	FS	WA	LG	ToP	CGL	CN	FR	Target
1	65	30	44	DC	First	three	Course-1	0.59	Not take the exam
2	28	55	44	DC	First	three	Course-1	0.59	Not take the exam
3	5	0	2	FF	First	three	Course-1	0.59	Took the exam
4	45	50	48	DC	First	three	Course-1	0.59	Not take the exam
5	68	15	36	FF	First	three	Course-1	0.59	Took the exam
6	20	20	20	FF	First	three	Course-1	0.59	Took the exam
7	10	10	10	FF	First	three	Course-1	0.59	Took the exam
8	33	35	34	FF	First	three	Course-1	0.59	Took the exam
9	40	25	31	FF	First	three	Course-1	0.59	Took the exam
10	15	20	18	FF	First	three	Course-1	0.59	Took the exam
11	53	5	24	FF	First	three	Course-1	0.59	Took the exam
12	38	15	24	FF	First	three	Course-1	0.59	Not take the exam
13	28	10	17	FF	First	three	Course-1	0.59	Took the exam
14	17	25	22	FF	First	three	Course-1	0.59	Took the exam
15	55	30	40	DD	First	three	Course-1	0.59	Took the exam
16	15	50	36	FF	First	three	Course-1	0.59	Not take the exam
17	20	40	32	FF	First	three	Course-1	0.59	Not take the exam
18	60	15	33	FF	First	three	Course-1	0.59	Took the exam
19	48	25	34	FF	First	three	Course-1	0.59	Took the exam
20	35	5	17	FF	First	three	Course-1	0.59	Not take the exam
21	50	35	41	DD	First	three	Course-1	0.59	Took the exam
22	15	0	6	FF	First	three	Course-1	0.59	Not take the exam
23	25	5	13	FF	First	three	Course-1	0.59	Took the exam
24	50	35	41	DD	First	three	Course-1	0.59	Not take the exam
25	55	30	40	DD	First	three	Course-1	0.59	Took the exam
26	49	10	26	FF	First	three	Course-1	0.59	Took the exam
27	27	0	11	FF	Second	three	Course-1	0.8	Not take the exam
28	23	0	9	FF	Second	three	Course-1	0.8	Took the exam
29	48	30	37	FF	Second	three	Course-1	0.8	Took the exam
30	55	15	31	FF	Second	three	Course-1	0.8	Took the exam
31	2	0	1	FF	Second	three	Course-1	0.8	Not take the exam
32	32	40	37	FF	Second	three	Course-1	0.8	Took the exam
33	60	33	44	DC	Second	three	Course-1	0.8	Not take the exam
34	15	10	12	FF	Second	three	Course-1	0.8	Not take the exam
35	0	0	0	F	Second	three	Course-1	0.8	Not take the exam
36	25	30	28	FF	Second	three	Course-1	0.8	Took the exam
37	20	15	17	FF	Second	three	Course-1	0.8	Took the exam
38	20	0	8	FF	Second	three	Course-1	0.8	Not take the exam
39	40	0	16	FF	Second	three	Course-1	0.8	Not take the exam
40	20	35	29	FF	Second	three	Course-1	0.8	Took the exam
41	28	5	14	FF	Second	three	Course-1	0.8	Took the exam
42	5	0	2	FF	Second	three	Course-1	0.8	Not take the exam
43	25	20	22	FF	Second	three	Course-1	0.8	Took the exam
44	35	35	35	FF	Second	three	Course-1	0.8	Took the exam
45	33	1	14	FF	Second	three	Course-1	0.8	Took the exam
46	0	0	0	FF	Second	three	Course-1	0.8	Not take the exam
47	20	10	14	FF	Second	three	Course-1	0.8	Not take the exam
48	50	25	35	FF	Second	three	Course-1	0.8	Took the exam
49	58	35	44	DC	Second	three	Course-1	0.8	Took the exam
50	21	35	29	FF	Second	three	Course-1	0.8	Not take the exam
51	32	15	22	FF	Second	three	Course-1	0.8	Took the exam
52	17	15	16	FF	Second	three	Course-1	0.8	Took the exam
53	48	15	28	FF	Second	three	Course-1	0.8	Took the exam
54	63	25	40	FF	Second	three	Course-1	0.8	Took the exam
55	70	15	37	FF	Second	three	Course-1	0.8	Took the exam
56	25	40	34	FF	Second	three	Course-1	0.8	Took the exam
57	40	25	31	FF	Second	three	Course-1	0.8	Took the exam
58	15	15	15	FF	Second	three	Course-1	0.8	Not take the exam
59	33	1	14	FF	Second	three	Course-1	0.8	Not take the exam
60	43	20	29	FF	Second	three	Course-1	0.8	Took the exam
61	0	0	0	F	Second	three	Course-1	0.8	Not take the exam
62	48	0	0	F	First	one	Course-2	0.33	Not take the exam
63	60	40	48	DC	First	one	Course-2	0.33	Not take the exam
64	64	36	47	DC	First	one	Course-2	0.33	Took the exam
65	36	32	34	FF	First	one	Course-2	0.33	Took the exam
66	52	16	30	FF	First	one	Course-2	0.33	Took the exam
67	52	40	45	DC	First	one	Course-2	0.33	Not take the exam
68	44	40	42	DD	First	one	Course-2	0.33	Took the exam
69	0	0	0	F	First	one	Course-2	0.33	Not take the exam
70	44	48	46	DC	First	one	Course-2	0.33	Took the exam
71	0	0	0	F	First	one	Course-2	0.33	Not take the exam
72	36	56	48	DC	First	one	Course-2	0.33	Not take the exam
73	0	0	0	F	First	one	Course-2	0.33	Not take the exam
74	64	0	0	F	First	one	Course-2	0.33	Not take the exam
75	0	0	0	F	First	one	Course-2	0.33	Not take the exam
76	40	40	40	DD	First	one	Course-2	0.33	Not take the exam
77	48	48	48	DC	First	one	Course-2	0.33	Not take the exam
78	48	32	38	FF	First	one	Course-2	0.33	Took the exam
79	52	40	45	DC	First	one	Course-2	0.33	Not take the exam
80	36	32	34	FF	First	one	Course-2	0.33	Not take the exam
81	68	32	46	DC	First	one	Course-2	0.33	Took the exam
82	40	40	40	DD	First	one	Course-2	0.33	Not take the exam
83	60	28	41	FF	First	one	Course-2	0.33	Took the exam
84	48	48	48	DC	First	one	Course-2	0.33	Took the exam
85	48	44	46	DC	First	one	Course-2	0.33	Not take the exam
86	28	16	21	FF	First	one	Course-2	0.33	Not take the exam
87	16	36	28	FF	First	one	Course-2	0.33	Not take the exam
88	72	0	0	F	First	one	Course-2	0.33	Not take the exam
89	56	32	42	DD	First	one	Course-2	0.33	Not take the exam
90	20	24	22	FF	First	one	Course-2	0.33	Not take the exam
91	36	16	24	FF	First	one	Course-2	0.33	Took the exam
92	0	0	0	F	First	one	Course-2	0.33	Not take the exam
93	0	0	0	F	First	one	Course-2	0.33	Not take the exam
94	28	16	21	FF	First	one	Course-2	0.33	Took the exam
95	0	0	0	F	First	one	Course-2	0.33	Not take the exam
96	0	0	0	F	First	one	Course-2	0.33	Not take the exam
97	52	28	38	FF	Second	one	Course-2	0.45	Took the exam
98	44	36	39	FF	Second	one	Course-2	0.45	Took the exam
99	40	24	30	FF	Second	one	Course-2	0.45	Took the exam
100	52	36	42	DC	Second	one	Course-2	0.45	Took the exam
101	0	0	0	FF	Second	one	Course-2	0.45	Not take the exam
102	32	36	34	FF	Second	one	Course-2	0.45	Took the exam
103	40	24	30	FF	Second	one	Course-2	0.45	Took the exam
104	28	20	23	FF	Second	one	Course-2	0.45	Not take the exam
105	28	28	28	FF	Second	one	Course-2	0.45	Took the exam
106	20	0	8	FF	Second	one	Course-2	0.45	Not take the exam
107	52	20	33	FF	Second	one	Course-2	0.45	Took the exam
108	48	28	36	FF	Second	one	Course-2	0.45	Took the exam
109	0	0	0	F	Second	one	Course-2	0.45	Not take the exam
110	48	40	43	DC	Second	one	Course-2	0.45	Took the exam
111	48	36	41	DC	Second	one	Course-2	0.45	Took the exam
112	56	24	37	FF	Second	one	Course-2	0.45	Took the exam
113	48	40	43	DC	Second	one	Course-2	0.45	Took the exam
114	0	0	0	F	Second	one	Course-2	0.45	Not take the exam
115	40	44	42	DC	Second	one	Course-2	0.45	Took the exam
116	52	0	21	FF	Second	one	Course-2	0.45	Not take the exam
117	44	24	32	FF	Second	one	Course-2	0.45	Took the exam
118	52	36	42	DC	Second	one	Course-2	0.45	Took the exam
119	56	36	44	DC	Second	one	Course-2	0.45	Not take the exam
120	36	48	43	DC	Second	one	Course-2	0.45	Not take the exam
121	44	32	37	FF	Second	one	Course-2	0.45	Took the exam
122	64	20	38	FF	Second	one	Course-2	0.45	Took the exam
123	60	32	43	DC	Second	one	Course-2	0.45	Took the exam
124	52	36	42	DC	Second	one	Course-2	0.45	Not take the exam
125	44	44	44	DC	Second	one	Course-2	0.45	Not take the exam
126	44	44	44	DC	Second	one	Course-2	0.45	Not take the exam
127	0	0	0	F	Second	one	Course-2	0.45	Not take the exam
128	44	40	42	DC	Second	one	Course-2	0.45	Not take the exam
129	44	44	44	DC	Second	one	Course-2	0.45	Took the exam
131	48	32	38	FF	Second	one	Course-2	0.45	Took the exam
132	28	40	35	FF	Second	one	Course-2	0.45	Took the exam
133	0	0	0	F	Second	one	Course-2	0.45	Not take the exam
134	24	12	17	FF	Second	one	Course-2	0.45	Not take the exam
135	28	36	33	FF	Second	one	Course-2	0.45	Took the exam
136	20	24	22	FF	Second	one	Course-2	0.45	Not take the exam
137	24	12	17	FF	Second	one	Course-2	0.45	Took the exam
138	36	8	19	FF	Second	one	Course-2	0.45	Not take the exam
139	40	36	38	FF	Second	one	Course-2	0.45	Took the exam
140	32	24	27	FF	Second	one	Course-2	0.45	Not take the exam
141	32	16	22	FF	Second	one	Course-2	0.45	Not take the exam
142	32	32	32	FF	Second	one	Course-2	0.45	Took the exam
143	20	16	18	FF	Second	one	Course-2	0.45	Not take the exam
144	40	16	26	FF	Second	one	Course-2	0.45	Not take the exam
145	20	12	15	FF	Second	one	Course-2	0.45	Not take the exam
146	24	40	34	FF	Second	one	Course-2	0.45	Took the exam
147	0	28	17	FF	Second	one	Course-2	0.45	Not take the exam
148	20	20	20	FF	Second	one	Course-2	0.45	Not take the exam
149	0	0	0	F	Second	one	Course-2	0.45	Not take the exam
150	0	0	0	F	First	three	Course-3	0.69	Not take the exam
151	5	0	2	FF	First	three	Course-3	0.69	Took the exam
152	16	17	17	FF	First	three	Course-3	0.69	Not take the exam
153	5	36	24	FF	First	three	Course-3	0.69	Not take the exam
154	0	0	0	F	First	three	Course-3	0.69	Not take the exam
155	15	55	39	FF	First	three	Course-3	0.69	Took the exam
156	10	31	23	FF	First	three	Course-3	0.69	Not take the exam
157	10	36	26	FF	First	three	Course-3	0.69	Took the exam
158	20	33	28	FF	First	three	Course-3	0.69	Took the exam
159	35	36	36	FF	First	three	Course-3	0.69	Took the exam
160	20	41	33	FF	First	three	Course-3	0.69	Took the exam
161	20	41	33	FF	First	three	Course-3	0.69	Took the exam
162	15	34	26	FF	First	three	Course-3	0.69	Took the exam
163	26	47	39	FF	First	three	Course-3	0.69	Took the exam
164	15	14	14	FF	First	three	Course-3	0.69	Took the exam
165	5	37	24	FF	First	three	Course-3	0.69	Not take the exam
166	5	41	27	FF	First	three	Course-3	0.69	Took the exam
167	40	16	26	FF	First	three	Course-3	0.69	Not take the exam
168	5	36	24	FF	First	three	Course-3	0.69	Took the exam
169	5	0	2	FF	First	three	Course-3	0.69	Not take the exam
170	23	42	34	FF	First	three	Course-3	0.69	Took the exam
171	5	26	18	FF	First	three	Course-3	0.69	Took the exam
172	15	49	35	FF	First	three	Course-3	0.69	Took the exam
173	25	18	21	FF	First	three	Course-3	0.69	Not take the exam
174	18	32	26	FF	First	three	Course-3	0.69	Not take the exam
175	27	30	29	FF	First	three	Course-3	0.69	Took the exam
176	20	19	19	FF	First	three	Course-3	0.69	Not take the exam
177	31	45	39	FF	First	three	Course-3	0.69	Took the exam
178	26	33	30	FF	First	three	Course-3	0.69	Took the exam
179	5	55	35	FF	First	three	Course-3	0.69	Took the exam
180	30	42	37	FF	First	three	Course-3	0.69	Took the exam
181	21	42	34	FF	First	three	Course-3	0.69	Took the exam
182	16	41	31	FF	First	three	Course-3	0.69	Took the exam
183	0	13	8	FF	First	three	Course-3	0.69	Took the exam
184	15	38	29	FF	First	three	Course-3	0.69	Took the exam
185	10	20	16	FF	First	three	Course-3	0.69	Took the exam
186	30	36	34	FF	First	three	Course-3	0.69	Took the exam
187	11	57	39	FF	First	three	Course-3	0.69	Not take the exam
188	1	30	18	FF	First	three	Course-3	0.69	Took the exam
189	25	45	37	FF	First	three	Course-3	0.69	Took the exam
190	20	7	12	FF	First	three	Course-3	0.69	Not take the exam
191	32	19	24	FF	First	three	Course-3	0.69	Not take the exam
192	10	38	27	FF	First	three	Course-3	0.69	Not take the exam
193	40	37	38	FF	First	three	Course-3	0.69	Took the exam
194	30	27	28	FF	First	three	Course-3	0.69	Took the exam
195	10	20	16	FF	First	three	Course-3	0.69	Not take the exam
196	10	11	11	FF	First	three	Course-3	0.69	Not take the exam
197	16	9	12	FF	First	three	Course-3	0.69	Not take the exam
198	15	22	19	FF	First	three	Course-3	0.69	Took the exam
199	12	50	35	FF	First	three	Course-3	0.69	Took the exam
200	19	48	36	FF	First	three	Course-3	0.69	Not take the exam
201	27	43	37	FF	First	three	Course-3	0.69	Took the exam
202	15	19	17	FF	First	three	Course-3	0.69	Took the exam
203	10	20	16	FF	First	three	Course-3	0.69	Not take the exam
204	25	45	37	FF	First	three	Course-3	0.69	Not take the exam
205	26	35	31	FF	First	three	Course-3	0.69	Took the exam
206	15	0	6	FF	First	three	Course-3	0.69	Not take the exam
207	25	28	27	FF	First	three	Course-3	0.69	Took the exam
208	31	30	30	FF	First	three	Course-3	0.69	Not take the exam
209	15	31	25	FF	First	three	Course-3	0.69	Not take the exam
210	15	0	6	FF	First	three	Course-3	0.69	Not take the exam
211	23	35	30	FF	First	three	Course-3	0.69	Not take the exam
212	21	41	33	FF	First	three	Course-3	0.69	Took the exam
213	16	11	13	FF	First	three	Course-3	0.69	Not take the exam
214	22	44	35	FF	First	three	Course-3	0.69	Took the exam
215	30	34	32	FF	Second	three	Course-3	0.81	Took the exam
216	20	25	23	FF	Second	three	Course-3	0.81	Took the exam
217	35	40	38	FF	Second	three	Course-3	0.81	Took the exam
218	10	32	23	FF	Second	three	Course-3	0.81	Not take the exam
219	0	32	19	FF	Second	three	Course-3	0.81	Took the exam
220	25	0	0	F	Second	three	Course-3	0.81	Not take the exam
221	15	55	39	FF	Second	three	Course-3	0.81	Took the exam
222	15	39	29	FF	Second	three	Course-3	0.81	Took the exam
223	0	42	25	FF	Second	three	Course-3	0.81	Took the exam
224	20	0	8	FF	Second	three	Course-3	0.81	Not take the exam
225	31	23	26	FF	Second	three	Course-3	0.81	Not take the exam
226	30	0	0	F	Second	three	Course-3	0.81	Not take the exam
227	20	43	34	FF	Second	three	Course-3	0.81	Took the exam
228	5	30	20	FF	Second	three	Course-3	0.81	Took the exam
229	25	0	0	F	Second	three	Course-3	0.81	Not take the exam
230	15	19	17	FF	Second	three	Course-3	0.81	Took the exam
231	27	46	38	FF	Second	three	Course-3	0.81	Took the exam
232	0	41	25	FF	Second	three	Course-3	0.81	Took the exam
233	41	34	37	FF	Second	three	Course-3	0.81	Took the exam
234	0	0	0	F	Second	three	Course-3	0.81	Not take the exam
235	10	44	30	FF	Second	three	Course-3	0.81	Took the exam
236	0	39	23	FF	Second	three	Course-3	0.81	Took the exam
237	10	21	17	FF	Second	three	Course-3	0.81	Not take the exam
238	5	58	37	FF	Second	three	Course-3	0.81	Took the exam
239	5	35	23	FF	Second	three	Course-3	0.81	Took the exam
240	10	29	21	FF	Second	three	Course-3	0.81	Not take the exam
241	0	0	0	F	Second	three	Course-3	0.81	Not take the exam
242	35	32	33	FF	Second	three	Course-3	0.81	Took the exam
243	0	0	0	F	Second	three	Course-3	0.81	Not take the exam
244	31	32	32	FF	Second	three	Course-3	0.81	Took the exam
245	30	14	20	FF	Second	three	Course-3	0.81	Took the exam
246	29	39	35	FF	Second	three	Course-3	0.81	Took the exam
247	23	45	36	FF	Second	three	Course-3	0.81	Took the exam
248	32	25	28	FF	Second	three	Course-3	0.81	Took the exam
249	20	16	18	FF	Second	three	Course-3	0.81	Took the exam
250	10	34	24	FF	Second	three	Course-3	0.81	Not take the exam
251	25	20	22	FF	Second	three	Course-3	0.81	Took the exam
252	5	42	27	FF	Second	three	Course-3	0.81	Took the exam
253	0	0	0	F	Second	three	Course-3	0.81	Not take the exam
254	24	13	17	FF	Second	three	Course-3	0.81	Took the exam
255	22	16	18	FF	Second	three	Course-3	0.81	Took the exam
256	5	38	25	FF	Second	three	Course-3	0.81	Took the exam
257	10	25	19	FF	Second	three	Course-3	0.81	Took the exam
258	10	16	14	FF	Second	three	Course-3	0.81	Took the exam
259	66	15	35	FF	Second	three	Course-3	0.81	Took the exam
260	51	25	35	FF	Second	three	Course-3	0.81	Took the exam
261	20	15	17	FF	Second	three	Course-3	0.81	Took the exam
262	20	27	24	FF	Second	three	Course-3	0.81	Took the exam
263	10	30	22	FF	Second	three	Course-3	0.81	Took the exam
264	5	21	15	FF	Second	three	Course-3	0.81	Took the exam
265	15	14	14	FF	Second	three	Course-3	0.81	Took the exam
266	15	0	6	FF	Second	three	Course-3	0.81	Took the exam
267	15	28	23	FF	Second	three	Course-3	0.81	Took the exam
268	22	20	21	FF	Second	three	Course-3	0.81	Not take the exam
269	23	20	21	FF	Second	three	Course-3	0.81	Took the exam
270	20	47	36	FF	Second	three	Course-3	0.81	Took the exam
271	0	41	25	FF	Second	three	Course-3	0.81	Took the exam
272	2	36	22	FF	Second	three	Course-3	0.81	Took the exam
273	15	25	21	FF	Second	three	Course-3	0.81	Not take the exam
274	10	18	15	FF	Second	three	Course-3	0.81	Took the exam
275	39	23	29	FF	Second	three	Course-3	0.81	Took the exam
276	10	32	23	FF	Second	three	Course-3	0.81	Took the exam
277	51	14	29	FF	Second	three	Course-3	0.81	Took the exam
278	20	14	16	FF	Second	three	Course-3	0.81	Took the exam
279	20	15	17	FF	Second	three	Course-3	0.81	Took the exam
280	20	9	13	FF	Second	three	Course-3	0.81	Not take the exam
281	10	25	19	FF	Second	three	Course-3	0.81	Took the exam
282	15	10	12	FF	Second	three	Course-3	0.81	Not take the exam
283	10	12	11	FF	Second	three	Course-3	0.81	Took the exam
284	0	0	0	F	Second	three	Course-3	0.81	Not take the exam
285	15	22	19	FF	Second	three	Course-3	0.81	Took the exam
286	13	22	18	FF	Second	three	Course-3	0.81	Took the exam
287	0	0	0	F	Second	three	Course-3	0.81	Not take the exam
288	26	42	36	FF	Second	three	Course-3	0.81	Not take the exam
289	0	0	0	F	First	two	Course-4	0.56	Not take the exam
290	4	0	0	F	First	two	Course-4	0.56	Not take the exam
291	5	0	2	FF	First	two	Course-4	0.56	Not take the exam
292	0	0	0	FF	First	two	Course-4	0.56	Not take the exam
293	0	0	0	F	First	two	Course-4	0.56	Not take the exam
294	14	0	0	F	First	two	Course-4	0.56	Not take the exam
295	25	56	44	DC	First	two	Course-4	0.56	Took the exam
296	43	45	44	DC	First	two	Course-4	0.56	Took the exam
297	5	20	14	FF	First	two	Course-4	0.56	Took the exam
298	0	0	0	FF	First	two	Course-4	0.56	Not take the exam
299	25	24	24	FF	First	two	Course-4	0.56	Took the exam
300	10	28	21	FF	First	two	Course-4	0.56	Took the exam
301	5	72	45	DC	First	two	Course-4	0.56	Not take the exam
302	5	0	2	FF	First	two	Course-4	0.56	Not take the exam
303	25	16	20	FF	First	two	Course-4	0.56	Took the exam
304	8	52	34	FF	First	two	Course-4	0.56	Took the exam
305	5	20	14	FF	First	two	Course-4	0.56	Took the exam
306	5	24	16	FF	First	two	Course-4	0.56	Took the exam
307	5	0	2	FF	First	two	Course-4	0.56	Not take the exam
308	23	22	22	FF	First	two	Course-4	0.56	Took the exam
309	15	32	25	FF	First	two	Course-4	0.56	Not take the exam
310	38	36	37	FF	First	two	Course-4	0.56	Took the exam
311	83	0	0	F	First	two	Course-4	0.56	Not take the exam
312	38	37	37	FF	First	two	Course-4	0.56	Took the exam
313	34	56	47	DC	First	two	Course-4	0.56	Took the exam
314	26	50	40	DD	First	two	Course-4	0.56	Took the exam
315	26	47	39	FF	First	two	Course-4	0.56	Took the exam
316	22	29	26	FF	First	two	Course-4	0.56	Took the exam
317	51	0	0	F	First	two	Course-4	0.56	Not take the exam
318	24	55	43	DC	First	two	Course-4	0.56	Took the exam
319	50	38	43	DC	First	two	Course-4	0.56	Not take the exam
320	48	0	19	FF	First	two	Course-4	0.56	Took the exam
321	27	42	36	FF	First	two	Course-4	0.56	Took the exam
322	36	41	39	FF	First	two	Course-4	0.56	Took the exam
323	20	0	0	F	First	two	Course-4	0.56	Not take the exam
324	13	0	0	F	First	two	Course-4	0.56	Not take the exam
325	38	42	40	DD	First	two	Course-4	0.56	Took the exam
326	23	0	9	FF	First	two	Course-4	0.56	Took the exam
327	49	41	44	DC	First	two	Course-4	0.56	Not take the exam
328	39	24	30	FF	First	two	Course-4	0.56	Took the exam
329	40	47	44	DC	First	two	Course-4	0.56	Not take the exam
330	30	27	28	FF	First	two	Course-4	0.56	Took the exam
331	55	42	47	DC	First	two	Course-4	0.56	Not take the exam
332	23	0	9	FF	First	two	Course-4	0.56	Took the exam
333	34	41	38	FF	First	two	Course-4	0.56	Took the exam
334	38	0	15	FF	First	two	Course-4	0.56	Not take the exam
335	49	39	43	DC	First	two	Course-4	0.56	Took the exam
336	26	49	40	DD	First	two	Course-4	0.56	Not take the exam
337	10	28	21	FF	First	two	Course-4	0.56	Took the exam
338	42	35	38	FF	First	two	Course-4	0.56	Took the exam
339	14	0	0	F	First	two	Course-4	0.56	Not take the exam
340	50	28	37	FF	First	two	Course-4	0.56	Not take the exam
341	44	48	46	DC	First	two	Course-4	0.56	Took the exam
342	30	0	12	FF	Second	two	Course-4	0.68	Took the exam
343	25	0	10	FF	Second	two	Course-4	0.68	Not take the exam
344	20	0	8	FF	Second	two	Course-4	0.68	Not take the exam
345	5	32	21	FF	Second	two	Course-4	0.68	Took the exam
346	20	16	18	FF	Second	two	Course-4	0.68	Took the exam
347	40	0	0	F	Second	two	Course-4	0.68	Not take the exam
348	20	52	39	FF	Second	two	Course-4	0.68	Not take the exam
349	0	0	0	F	Second	two	Course-4	0.68	Not take the exam
350	13	40	29	FF	Second	two	Course-4	0.68	Took the exam
351	0	0	0	F	Second	two	Course-4	0.68	Not take the exam
352	5	28	19	FF	Second	two	Course-4	0.68	Took the exam
353	44	37	40	DC	Second	two	Course-4	0.68	Took the exam
354	28	33	31	FF	Second	two	Course-4	0.68	Took the exam
355	5	0	2	FF	Second	two	Course-4	0.68	Took the exam
356	30	36	34	FF	Second	two	Course-4	0.68	Took the exam
357	0	0	0	FF	Second	two	Course-4	0.68	Not take the exam
358	25	28	27	FF	Second	two	Course-4	0.68	Took the exam
359	5	0	2	FF	Second	two	Course-4	0.68	Not take the exam
360	5	8	7	FF	Second	two	Course-4	0.68	Took the exam
361	10	28	21	FF	Second	two	Course-4	0.68	Took the exam
362	5	0	2	FF	Second	two	Course-4	0.68	Not take the exam
363	5	36	24	FF	Second	two	Course-4	0.68	Took the exam
364	3	0	1	FF	Second	two	Course-4	0.68	Took the exam
365	5	0	2	FF	Second	two	Course-4	0.68	Not take the exam
366	5	20	14	FF	Second	two	Course-4	0.68	Took the exam
367	28	44	38	FF	Second	two	Course-4	0.68	Took the exam
368	10	0	4	FF	Second	two	Course-4	0.68	Not take the exam
369	25	24	24	FF	Second	two	Course-4	0.68	Took the exam
370	0	0	0	FF	Second	two	Course-4	0.68	Not take the exam
371	10	32	23	FF	Second	two	Course-4	0.68	Took the exam
372	5	0	2	FF	Second	two	Course-4	0.68	Took the exam
373	5	36	24	FF	Second	two	Course-4	0.68	Took the exam
374	5	24	16	FF	Second	two	Course-4	0.68	Not take the exam
375	5	0	2	FF	Second	two	Course-4	0.68	Took the exam
376	3	0	1	FF	Second	two	Course-4	0.68	Took the exam
377	28	20	23	FF	Second	two	Course-4	0.68	Not take the exam
378	20	16	18	FF	Second	two	Course-4	0.68	Took the exam
379	0	0	0	FF	Second	two	Course-4	0.68	Not take the exam
380	32	25	28	FF	Second	two	Course-4	0.68	Not take the exam
381	5	28	19	FF	Second	two	Course-4	0.68	Took the exam
382	13	20	17	FF	Second	two	Course-4	0.68	Not take the exam
383	21	30	26	FF	Second	two	Course-4	0.68	Took the exam
384	30	27	28	FF	Second	two	Course-4	0.68	Took the exam
385	18	0	7	FF	Second	two	Course-4	0.68	Not take the exam
386	39	36	37	FF	Second	two	Course-4	0.68	Not take the exam
387	35	41	39	FF	Second	two	Course-4	0.68	Took the exam
388	0	0	0	F	Second	two	Course-4	0.68	Not take the exam
389	0	0	0	F	Second	two	Course-4	0.68	Not take the exam
390	32	41	37	FF	Second	two	Course-4	0.68	Took the exam
391	25	33	30	FF	Second	two	Course-4	0.68	Took the exam
392	39	41	40	DC	Second	two	Course-4	0.68	Took the exam
393	35	0	0	F	Second	two	Course-4	0.68	Not take the exam
394	25	34	30	FF	Second	two	Course-4	0.68	Took the exam
395	0	0	0	F	Second	two	Course-4	0.68	Not take the exam
396	43	34	38	FF	Second	two	Course-4	0.68	Not take the exam
397	20	59	43	DC	Second	two	Course-4	0.68	Took the exam
398	0	0	0	F	Second	two	Course-4	0.68	Not take the exam
399	47	39	42	DC	Second	two	Course-4	0.68	Not take the exam
400	22	0	0	F	Second	two	Course-4	0.68	Not take the exam
401	52	35	42	DC	Second	two	Course-4	0.68	Took the exam
402	37	30	33	FF	Second	two	Course-4	0.68	Took the exam
403	22	0	9	FF	Second	two	Course-4	0.68	Took the exam
404	24	29	27	FF	Second	two	Course-4	0.68	Took the exam
405	32	36	34	FF	Second	two	Course-4	0.68	Took the exam
406	10	21	17	FF	Second	two	Course-4	0.68	Not take the exam
407	25	50	40	DC	Second	two	Course-4	0.68	Took the exam
408	44	34	38	FF	Second	two	Course-4	0.68	Took the exam
409	33	27	29	FF	Second	two	Course-4	0.68	Took the exam
410	24	45	37	FF	Second	two	Course-4	0.68	Took the exam
411	30	36	34	FF	Second	two	Course-4	0.68	Took the exam
412	33	47	41	DC	Second	two	Course-4	0.68	Not take the exam
413	15	32	25	FF	Second	two	Course-4	0.68	Took the exam
414	36	34	35	FF	Second	two	Course-4	0.68	Not take the exam
415	10	40	28	FF	Second	two	Course-4	0.68	Took the exam
416	5	0	2	FF	Second	two	Course-4	0.68	Took the exam
417	0	0	0	F	Second	two	Course-4	0.68	Not take the exam
418	0	0	0	FF	Second	two	Course-4	0.68	Not take the exam
419	5	0	2	FF	First	two	Course-5	0.56	Took the exam
420	0	20	12	FF	First	two	Course-5	0.56	Not take the exam
421	32	35	34	FF	First	two	Course-5	0.56	Took the exam
422	0	0	0	FF	First	two	Course-5	0.56	Not take the exam
423	20	39	31	FF	First	two	Course-5	0.56	Took the exam
424	0	0	0	FF	First	two	Course-5	0.56	Not take the exam
425	20	0	8	FF	First	two	Course-5	0.56	Not take the exam
426	22	42	34	FF	First	two	Course-5	0.56	Took the exam
427	32	40	37	FF	First	two	Course-5	0.56	Took the exam
428	32	30	31	FF	First	two	Course-5	0.56	Took the exam
429	0	0	0	FF	First	two	Course-5	0.56	Not take the exam
430	37	35	36	FF	First	two	Course-5	0.56	Took the exam
431	6	30	20	FF	First	two	Course-5	0.56	Took the exam
432	36	20	26	FF	First	two	Course-5	0.56	Took the exam
433	32	0	13	FF	First	two	Course-5	0.56	Took the exam
434	24	10	16	FF	First	two	Course-5	0.56	Took the exam
435	45	31	37	FF	First	two	Course-5	0.56	Took the exam
436	36	41	39	FF	First	two	Course-5	0.56	Took the exam
437	15	30	24	FF	First	two	Course-5	0.56	Took the exam
438	14	10	12	FF	First	two	Course-5	0.56	Took the exam
439	15	32	25	FF	First	two	Course-5	0.56	Took the exam
440	39	47	44	DC	First	two	Course-5	0.56	Not take the exam
441	34	35	35	FF	First	two	Course-5	0.56	Took the exam
442	34	37	36	FF	First	two	Course-5	0.56	Took the exam
443	25	45	37	FF	First	two	Course-5	0.56	Took the exam
444	20	45	35	FF	First	two	Course-5	0.56	Took the exam
445	30	48	41	DC	First	two	Course-5	0.56	Took the exam
446	5	0	2	FF	First	two	Course-5	0.56	Took the exam
447	48	0	19	FF	First	two	Course-5	0.56	Took the exam
448	30	42	37	FF	First	two	Course-5	0.56	Not take the exam
449	21	51	39	FF	First	two	Course-5	0.56	Took the exam
450	22	0	9	FF	First	two	Course-5	0.56	Took the exam
451	16	65	45	DC	First	two	Course-5	0.56	Not take the exam
452	14	35	27	FF	First	two	Course-5	0.56	Took the exam
453	1	0	0	FF	First	two	Course-5	0.56	Not take the exam
454	6	45	29	FF	First	two	Course-5	0.56	Took the exam
455	10	0	4	FF	First	two	Course-5	0.56	Not take the exam
456	27	20	23	FF	First	two	Course-5	0.56	Took the exam
457	54	0	22	FF	First	two	Course-5	0.56	Took the exam
458	0	0	0	FF	First	two	Course-5	0.56	Not take the exam
459	18	60	43	DC	First	two	Course-5	0.56	Not take the exam
460	49	0	20	FF	First	two	Course-5	0.56	Not take the exam
461	0	0	0	FF	First	two	Course-5	0.56	Not take the exam
462	31	26	28	FF	First	two	Course-5	0.56	Took the exam
463	10	20	16	FF	First	two	Course-5	0.56	Took the exam
464	24	34	30	FF	First	two	Course-5	0.56	Took the exam
465	35	48	43	DC	First	two	Course-5	0.56	Took the exam
466	2	0	1	FF	First	two	Course-5	0.56	Not take the exam
467	12	0	5	FF	First	two	Course-5	0.56	Not take the exam
468	24	46	37	FF	First	two	Course-5	0.56	Took the exam
469	20	52	39	FF	First	two	Course-5	0.56	Took the exam
470	20	50	38	FF	First	two	Course-5	0.56	Took the exam
471	16	37	29	FF	First	two	Course-5	0.56	Took the exam
472	0	0	0	FF	First	two	Course-5	0.56	Not take the exam
473	0	0	0	FF	First	two	Course-5	0.56	Not take the exam
474	20	60	44	DC	First	two	Course-5	0.56	Took the exam
475	0	0	0	FF	First	two	Course-5	0.56	Not take the exam
476	2	20	13	FF	First	two	Course-5	0.56	Not take the exam
477	8	15	12	FF	Second	two	Course-5	0.68	Took the exam
478	0	0	0	FF	Second	two	Course-5	0.68	Not take the exam
479	30	0	12	FF	Second	two	Course-5	0.68	Took the exam
480	30	32	31	FF	Second	two	Course-5	0.68	Took the exam
481	1	0	0	FF	Second	two	Course-5	0.68	Not take the exam
482	30	46	40	DC	Second	two	Course-5	0.68	Not take the exam
483	25	0	10	FF	Second	two	Course-5	0.68	Took the exam
484	30	34	32	FF	Second	two	Course-5	0.68	Took the exam
485	30	30	30	FF	Second	two	Course-5	0.68	Took the exam
486	28	35	32	FF	Second	two	Course-5	0.68	Took the exam
487	4	0	2	FF	Second	two	Course-5	0.68	Took the exam
488	14	0	6	FF	Second	two	Course-5	0.68	Not take the exam
489	0	0	0	FF	Second	two	Course-5	0.68	Not take the exam
490	14	45	33	FF	Second	two	Course-5	0.68	Not take the exam
491	0	0	0	FF	Second	two	Course-5	0.68	Not take the exam
492	0	5	3	FF	Second	two	Course-5	0.68	Took the exam
493	8	12	10	FF	Second	two	Course-5	0.68	Took the exam
494	14	0	6	FF	Second	two	Course-5	0.68	Took the exam
495	14	0	6	FF	Second	two	Course-5	0.68	Not take the exam
496	12	15	14	FF	Second	two	Course-5	0.68	Not take the exam
497	0	0	0	FF	Second	two	Course-5	0.68	Not take the exam
498	8	58	38	FF	Second	two	Course-5	0.68	Took the exam
499	20	20	20	FF	Second	two	Course-5	0.68	Took the exam
500	5	0	2	FF	Second	two	Course-5	0.68	Not take the exam
501	0	0	0	FF	Second	two	Course-5	0.68	Not take the exam
502	0	0	0	FF	Second	two	Course-5	0.68	Not take the exam
503	0	0	0	FF	Second	two	Course-5	0.68	Not take the exam
504	0	0	0	FF	Second	two	Course-5	0.68	Not take the exam
505	26	10	16	FF	Second	two	Course-5	0.68	Took the exam
506	26	10	16	FF	Second	two	Course-5	0.68	Not take the exam
507	0	0	0	FF	Second	two	Course-5	0.68	Not take the exam
508	10	5	7	FF	Second	two	Course-5	0.68	Not take the exam
509	0	0	0	FF	Second	two	Course-5	0.68	Not take the exam
510	0	0	0	FF	Second	two	Course-5	0.68	Not take the exam
511	33	47	41	DC	Second	two	Course-5	0.68	Took the exam
512	10	5	7	FF	Second	two	Course-5	0.68	Took the exam
513	37	23	29	FF	Second	two	Course-5	0.68	Took the exam
514	10	0	4	FF	Second	two	Course-5	0.68	Not take the exam
515	20	25	23	FF	Second	two	Course-5	0.68	Took the exam
516	45	2	19	FF	Second	two	Course-5	0.68	Not take the exam
517	16	50	36	FF	Second	two	Course-5	0.68	Took the exam
518	0	27	16	FF	Second	two	Course-5	0.68	Not take the exam
519	0	0	0	FF	Second	two	Course-5	0.68	Not take the exam
520	52	20	33	FF	Second	two	Course-5	0.68	Took the exam
521	23	39	33	FF	Second	two	Course-5	0.68	Took the exam
522	10	55	37	FF	Second	two	Course-5	0.68	Took the exam
523	35	20	26	FF	Second	two	Course-5	0.68	Took the exam
524	44	30	36	FF	Second	two	Course-5	0.68	Took the exam
525	25	38	33	FF	Second	two	Course-5	0.68	Took the exam
526	14	39	29	FF	Second	two	Course-5	0.68	Took the exam
527	42	38	40	DC	Second	two	Course-5	0.68	Took the exam
528	20	37	30	FF	Second	two	Course-5	0.68	Took the exam
529	12	1	5	FF	Second	two	Course-5	0.68	Not take the exam
530	12	28	22	FF	Second	two	Course-5	0.68	Not take the exam
531	30	32	31	FF	Second	two	Course-5	0.68	Took the exam
532	28	42	36	FF	Second	two	Course-5	0.68	Took the exam
533	50	30	38	FF	Second	two	Course-5	0.68	Took the exam
534	2	0	1	FF	Second	two	Course-5	0.68	Not take the exam
535	30	40	36	FF	Second	two	Course-5	0.68	Took the exam
536	22	26	24	FF	Second	two	Course-5	0.68	Took the exam
537	1	0	0	FF	Second	two	Course-5	0.68	Not take the exam
538	25	47	38	FF	Second	two	Course-5	0.68	Took the exam
539	20	10	14	FF	Second	two	Course-5	0.68	Not take the exam
540	45	27	34	FF	Second	two	Course-5	0.68	Took the exam
541	22	0	9	FF	Second	two	Course-5	0.68	Not take the exam
542	28	50	41	DC	Second	two	Course-5	0.68	Not take the exam
543	1	5	3	FF	Second	two	Course-5	0.68	Took the exam
544	8	1	4	FF	Second	two	Course-5	0.68	Not take the exam
545	0	0	0	FF	Second	two	Course-5	0.68	Not take the exam
546	18	0	7	FF	Second	two	Course-5	0.68	Not take the exam
547	0	0	0	FF	Second	two	Course-5	0.68	Not take the exam
548	45	0	18	FF	Second	two	Course-5	0.68	Took the exam
549	10	0	4	FF	Second	two	Course-5	0.68	Not take the exam
550	2	10	7	FF	Second	two	Course-5	0.68	Took the exam
551	75	45	57	DC	First	four	Course-6	0.18	Took the exam
552	50	40	44	FF	First	four	Course-6	0.18	Took the exam
553	15	78	53	DD	First	four	Course-6	0.18	Took the exam
554	80	38	55	DC	First	four	Course-6	0.18	Not take the exam
555	45	30	36	FF	First	four	Course-6	0.18	Took the exam
556	0	0	0	F	First	four	Course-6	0.18	Not take the exam
557	35	0	14	FF	First	four	Course-6	0.18	Took the exam
558	30	0	12	FF	Second	four	Course-6	0.08	Not take the exam
559	25	75	55	DC	Second	four	Course-6	0.08	Took the exam
560	20	70	50	DD	Second	four	Course-6	0.08	Not take the exam
561	60	23	38	FF	Second	four	Course-6	0.08	Took the exam
562	25	80	58	DC	Second	four	Course-6	0.08	Not take the exam
563	61	26	40	FF	First	four	Course-7	0.58	Took the exam
564	34	49	43	DC	First	four	Course-7	0.58	Not take the exam
565	39	35	37	FF	First	four	Course-7	0.58	Took the exam
566	36	21	27	FF	First	four	Course-7	0.58	Took the exam
567	36	12	22	FF	First	four	Course-7	0.58	Took the exam
568	29	22	25	FF	First	four	Course-7	0.58	Took the exam
569	29	35	33	FF	First	four	Course-7	0.58	Took the exam
570	26	40	34	FF	First	four	Course-7	0.58	Took the exam
571	41	48	45	DC	First	four	Course-7	0.58	Not take the exam
572	39	35	37	FF	First	four	Course-7	0.58	Took the exam
573	38	23	29	FF	First	four	Course-7	0.58	Took the exam
574	30	27	28	FF	First	four	Course-7	0.58	Took the exam
575	30	23	26	FF	First	four	Course-7	0.58	Took the exam
576	18	12	14	FF	First	four	Course-7	0.58	Not take the exam
577	42	40	41	DC	First	four	Course-7	0.58	Not take the exam
578	25	57	44	DC	First	four	Course-7	0.58	Not take the exam
579	37	49	44	DC	First	four	Course-7	0.58	Not take the exam
580	29	22	25	FF	First	four	Course-7	0.58	Took the exam
581	37	35	36	FF	First	four	Course-7	0.58	Took the exam
582	38	5	18	FF	First	four	Course-7	0.58	Not take the exam
583	14	14	14	FF	First	four	Course-7	0.58	Took the exam
584	0	0	0	F	First	four	Course-7	0.58	Not take the exam
585	46	45	45	DC	First	four	Course-7	0.58	Not take the exam
586	0	0	0	F	First	four	Course-7	0.58	Not take the exam
587	42	24	31	FF	First	four	Course-7	0.58	Took the exam
588	0	0	0	F	First	four	Course-7	0.58	Not take the exam
589	26	0	0	F	First	four	Course-7	0.58	Not take the exam
590	28	15	20	FF	First	four	Course-7	0.58	Not take the exam
591	38	36	37	FF	First	four	Course-7	0.58	Took the exam
592	46	43	44	DC	First	four	Course-7	0.58	Not take the exam
593	30	0	12	FF	Second	four	Course-7	0.9	Took the exam
594	28	40	35	FF	Second	four	Course-7	0.9	Took the exam
595	38	32	34	FF	Second	four	Course-7	0.9	Took the exam
596	52	35	42	FF	Second	four	Course-7	0.9	Took the exam
597	50	5	23	FF	Second	four	Course-7	0.9	Took the exam
598	34	0	0	F	Second	four	Course-7	0.9	Not take the exam
599	39	45	43	FF	Second	four	Course-7	0.9	Took the exam
600	33	18	24	FF	Second	four	Course-7	0.9	Took the exam
601	38	45	42	FF	Second	four	Course-7	0.9	Took the exam
602	31	0	12	FF	Second	four	Course-7	0.9	Took the exam
603	27	39	34	FF	Second	four	Course-7	0.9	Took the exam
604	48	51	50	DD	Second	four	Course-7	0.9	Not take the exam
605	38	69	57	DC	Second	four	Course-7	0.9	Not take the exam
606	57	58	58	DC	Second	four	Course-7	0.9	Not take the exam
607	34	19	25	FF	Second	four	Course-7	0.9	Took the exam
608	34	5	17	FF	Second	four	Course-7	0.9	Took the exam
609	26	13	18	FF	Second	four	Course-7	0.9	Not take the exam
610	33	0	13	FF	Second	four	Course-7	0.9	Not take the exam
611	0	0	0	F	Second	four	Course-7	0.9	Not take the exam
612	0	0	0	F	Second	four	Course-7	0.9	Not take the exam
613	0	0	0	F	Second	four	Course-7	0.9	Not take the exam
614	18	28	24	FF	Second	four	Course-7	0.9	Took the exam
615	21	0	8	FF	Second	four	Course-7	0.9	Took the exam
616	30	0	0	F	Second	four	Course-7	0.9	Not take the exam
617	26	0	0	F	Second	four	Course-7	0.9	Not take the exam
618	22	0	0	F	Second	four	Course-7	0.9	Not take the exam
619	19	23	21	FF	Second	four	Course-7	0.9	Took the exam
620	9	0	4	FF	First	one	Course-8	0.36	Not take the exam
621	18	50	37	FF	First	one	Course-8	0.36	Took the exam
622	42	0	17	FF	First	one	Course-8	0.36	Took the exam
623	4	60	38	FF	First	one	Course-8	0.36	Not take the exam
624	8	50	33	FF	First	one	Course-8	0.36	Not take the exam
625	37	60	51	DC	First	one	Course-8	0.36	Not take the exam
626	4	0	2	FF	First	one	Course-8	0.36	Not take the exam
627	35	0	14	FF	First	one	Course-8	0.36	Not take the exam
628	28	45	38	FF	First	one	Course-8	0.36	Took the exam
629	25	0	10	FF	First	one	Course-8	0.36	Took the exam
630	0	0	0	FF	First	one	Course-8	0.36	Not take the exam
631	36	55	47	DC	First	one	Course-8	0.36	Took the exam
632	40	0	16	FF	First	one	Course-8	0.36	Not take the exam
633	7	35	24	FF	First	one	Course-8	0.36	Not take the exam
634	8	80	51	DC	First	one	Course-8	0.36	Took the exam
635	35	50	44	DD	First	one	Course-8	0.36	Took the exam
636	17	35	28	FF	First	one	Course-8	0.36	Took the exam
637	2	40	25	FF	First	one	Course-8	0.36	Took the exam
638	30	60	48	DC	First	one	Course-8	0.36	Not take the exam
639	13	50	35	FF	First	one	Course-8	0.36	Took the exam
640	21	55	41	DD	First	one	Course-8	0.36	Took the exam
641	17	50	37	FF	First	one	Course-8	0.36	Took the exam
642	74	0	30	FF	First	one	Course-8	0.36	Not take the exam
643	0	0	0	F	First	one	Course-8	0.36	Not take the exam
644	0	0	0	F	First	one	Course-8	0.36	Not take the exam
645	23	60	45	DD	First	one	Course-8	0.36	Took the exam
646	22	0	9	FF	First	one	Course-8	0.36	Not take the exam
647	0	0	0	F	First	one	Course-8	0.36	Not take the exam
648	10	60	40	FF	First	one	Course-8	0.36	Not take the exam
649	28	55	44	DD	First	one	Course-8	0.36	Took the exam
650	35	20	26	FF	First	one	Course-8	0.36	Not take the exam
651	25	60	46	DD	First	one	Course-8	0.36	Took the exam
652	34	60	50	DC	First	one	Course-8	0.36	Not take the exam
653	22	35	30	FF	First	one	Course-8	0.36	Took the exam
654	37	60	51	DC	First	one	Course-8	0.36	Took the exam
655	9	65	43	DD	First	one	Course-8	0.36	Not take the exam
656	38	30	33	FF	First	one	Course-8	0.36	Took the exam
657	22	55	42	DD	First	one	Course-8	0.36	Not take the exam
658	33	55	46	DD	First	one	Course-8	0.36	Took the exam
659	13	35	26	FF	First	one	Course-8	0.36	Not take the exam
660	1	30	18	FF	First	one	Course-8	0.36	Not take the exam
661	2	50	31	FF	First	one	Course-8	0.36	Not take the exam
662	0	0	0	FF	First	one	Course-8	0.36	Not take the exam
663	0	0	0	FF	First	one	Course-8	0.36	Not take the exam
664	13	60	41	DD	First	one	Course-8	0.36	Took the exam
665	13	0	5	FF	First	one	Course-8	0.36	Not take the exam
666	0	0	0	FF	First	one	Course-8	0.36	Not take the exam
667	28	0	11	FF	Second	one	Course-8	0.49	Not take the exam
668	16	0	6	FF	Second	one	Course-8	0.49	Not take the exam
669	0	0	0	FF	Second	one	Course-8	0.49	Not take the exam
670	2	0	1	FF	Second	one	Course-8	0.49	Not take the exam
671	52	30	39	FF	Second	one	Course-8	0.49	Took the exam
672	0	0	0	FF	Second	one	Course-8	0.49	Not take the exam
673	3	0	1	FF	Second	one	Course-8	0.49	Not take the exam
674	0	0	0	FF	Second	one	Course-8	0.49	Not take the exam
675	11	0	4	FF	Second	one	Course-8	0.49	Not take the exam
676	13	45	32	FF	Second	one	Course-8	0.49	Took the exam
677	85	0	34	FF	Second	one	Course-8	0.49	Took the exam
678	8	0	3	FF	Second	one	Course-8	0.49	Not take the exam
679	33	40	37	FF	Second	one	Course-8	0.49	Took the exam
680	20	70	50	DC	Second	one	Course-8	0.49	Took the exam
681	6	35	23	FF	Second	one	Course-8	0.49	Not take the exam
682	8	50	33	FF	Second	one	Course-8	0.49	Not take the exam
683	0	0	0	FF	Second	one	Course-8	0.49	Took the exam
684	25	45	37	FF	Second	one	Course-8	0.49	Not take the exam
685	14	0	6	FF	Second	one	Course-8	0.49	Not take the exam
686	12	0	5	FF	Second	one	Course-8	0.49	Not take the exam
687	11	70	46	DC	Second	one	Course-8	0.49	Took the exam
688	17	55	40	DD	Second	one	Course-8	0.49	Not take the exam
689	17	25	22	FF	Second	one	Course-8	0.49	Not take the exam
690	9	35	25	FF	Second	one	Course-8	0.49	Not take the exam
691	23	30	27	FF	Second	one	Course-8	0.49	Took the exam
692	21	0	8	FF	Second	one	Course-8	0.49	Took the exam
693	15	70	48	DC	Second	one	Course-8	0.49	Not take the exam
694	9	35	25	FF	Second	one	Course-8	0.49	Not take the exam
695	15	25	21	FF	Second	one	Course-8	0.49	Took the exam
696	11	75	49	DC	Second	one	Course-8	0.49	Took the exam
697	0	40	24	FF	Second	one	Course-8	0.49	Not take the exam
698	11	50	34	FF	Second	one	Course-8	0.49	Took the exam
699	9	0	4	FF	Second	one	Course-8	0.49	Not take the exam
700	2	0	1	FF	Second	one	Course-8	0.49	Not take the exam
701	20	45	35	FF	Second	one	Course-8	0.49	Took the exam
702	5	70	44	DD	Second	one	Course-8	0.49	Not take the exam
703	0	0	0	F	Second	one	Course-8	0.49	Not take the exam
704	17	50	37	FF	Second	one	Course-8	0.49	Took the exam
705	5	70	44	DD	Second	one	Course-8	0.49	Not take the exam
706	21	0	8	FF	Second	one	Course-8	0.49	Not take the exam
707	23	50	39	FF	Second	one	Course-8	0.49	Took the exam
708	58	35	44	DD	Second	one	Course-8	0.49	Took the exam
709	13	40	29	FF	Second	one	Course-8	0.49	Not take the exam
710	7	35	24	FF	Second	one	Course-8	0.49	Not take the exam
711	22	40	33	FF	Second	one	Course-8	0.49	Not take the exam
712	16	70	48	DC	Second	one	Course-8	0.49	Not take the exam
713	18	50	37	FF	Second	one	Course-8	0.49	Took the exam
714	5	75	47	DC	Second	one	Course-8	0.49	Not take the exam
715	0	0	0	F	Second	one	Course-8	0.49	Not take the exam
716	0	0	0	F	Second	one	Course-8	0.49	Not take the exam
717	30	0	12	FF	Second	one	Course-8	0.49	Not take the exam
718	45	50	48	DC	Second	one	Course-8	0.49	Not take the exam
719	0	0	0	FF	Second	one	Course-8	0.49	Not take the exam
720	18	50	37	FF	Second	one	Course-8	0.49	Not take the exam
721	13	25	20	FF	Second	one	Course-8	0.49	Took the exam
722	1	20	12	FF	Second	one	Course-8	0.49	Not take the exam
723	3	10	7	FF	Second	one	Course-8	0.49	Took the exam
724	11	60	40	DD	Second	one	Course-8	0.49	Took the exam
725	15	70	48	DC	Second	one	Course-8	0.49	Took the exam
726	13	0	5	FF	Second	one	Course-8	0.49	Not take the exam
727	9	50	34	FF	Second	one	Course-8	0.49	Not take the exam
728	2	50	31	FF	Second	one	Course-8	0.49	Not take the exam
729	3	15	10	FF	Second	one	Course-8	0.49	Not take the exam
730	3	10	7	FF	Second	one	Course-8	0.49	Not take the exam
731	2	60	37	FF	Second	one	Course-8	0.49	Took the exam
732	18	60	43	DD	Second	one	Course-8	0.49	Took the exam
733	1	25	15	FF	Second	one	Course-8	0.49	Not take the exam
734	1	10	6	FF	Second	one	Course-8	0.49	Not take the exam
735	0	0	0	FF	Second	one	Course-8	0.49	Not take the exam
736	5	0	2	FF	First	one	Course-9	0.51	Not take the exam
737	15	0	6	FF	First	one	Course-9	0.51	Not take the exam
738	0	0	0	FF	First	one	Course-9	0.51	Not take the exam
739	40	40	40	DD	First	one	Course-9	0.51	Not take the exam
740	65	28	43	FF	First	one	Course-9	0.51	Took the exam
741	40	52	47	DC	First	one	Course-9	0.51	Not take the exam
742	35	44	40	DD	First	one	Course-9	0.51	Not take the exam
743	25	32	29	FF	First	one	Course-9	0.51	Took the exam
744	0	20	12	FF	First	one	Course-9	0.51	Not take the exam
745	0	0	0	FF	First	one	Course-9	0.51	Not take the exam
746	28	36	33	FF	First	one	Course-9	0.51	Not take the exam
747	10	48	33	FF	First	one	Course-9	0.51	Took the exam
748	50	40	44	DC	First	one	Course-9	0.51	Took the exam
749	35	36	36	FF	First	one	Course-9	0.51	Took the exam
750	100	0	40	FF	First	one	Course-9	0.51	Took the exam
751	40	36	38	FF	First	one	Course-9	0.51	Took the exam
752	45	28	35	FF	First	one	Course-9	0.51	Took the exam
753	20	32	27	FF	First	one	Course-9	0.51	Not take the exam
754	0	0	0	FF	First	one	Course-9	0.51	Not take the exam
755	15	24	20	FF	First	one	Course-9	0.51	Not take the exam
756	50	32	39	FF	First	one	Course-9	0.51	Took the exam
757	15	48	35	FF	First	one	Course-9	0.51	Not take the exam
758	43	36	39	FF	First	one	Course-9	0.51	Took the exam
759	27	44	37	FF	First	one	Course-9	0.51	Took the exam
760	40	48	45	DC	First	one	Course-9	0.51	Not take the exam
761	60	36	46	DC	First	one	Course-9	0.51	Not take the exam
762	60	36	46	DC	First	one	Course-9	0.51	Not take the exam
763	63	28	42	FF	First	one	Course-9	0.51	Took the exam
764	40	36	38	FF	First	one	Course-9	0.51	Took the exam
765	45	24	32	FF	First	one	Course-9	0.51	Took the exam
766	0	0	0	FF	First	one	Course-9	0.51	Not take the exam
767	50	36	42	DC	First	one	Course-9	0.51	Not take the exam
768	35	36	36	FF	First	one	Course-9	0.51	Took the exam
769	30	28	29	FF	First	one	Course-9	0.51	Took the exam
770	45	36	40	DD	First	one	Course-9	0.51	Not take the exam
771	0	0	0	FF	First	one	Course-9	0.51	Not take the exam
772	25	32	29	FF	First	one	Course-9	0.51	Took the exam
773	30	48	41	DD	First	one	Course-9	0.51	Not take the exam
774	60	32	43	DC	First	one	Course-9	0.51	Not take the exam
775	1	0	0	FF	First	one	Course-9	0.51	Not take the exam
776	0	0	0	FF	First	one	Course-9	0.51	Not take the exam
777	60	36	46	DC	First	one	Course-9	0.51	Not take the exam
778	40	40	40	DD	First	one	Course-9	0.51	Not take the exam
779	60	32	43	DC	First	one	Course-9	0.51	Not take the exam
780	1	20	12	FF	First	one	Course-9	0.51	Not take the exam
781	50	40	44	DC	First	one	Course-9	0.51	Not take the exam
782	35	44	40	DD	First	one	Course-9	0.51	Not take the exam
783	30	52	43	DC	First	one	Course-9	0.51	Not take the exam
784	45	36	40	DD	First	one	Course-9	0.51	Not take the exam
785	40	36	38	FF	First	one	Course-9	0.51	Not take the exam
786	33	52	44	DC	First	one	Course-9	0.51	Not take the exam
787	15	32	25	FF	First	one	Course-9	0.51	Not take the exam
788	50	44	46	DC	First	one	Course-9	0.51	Not take the exam
789	45	36	40	DD	First	one	Course-9	0.51	Not take the exam
790	25	20	22	FF	First	one	Course-9	0.51	Not take the exam
791	30	40	36	FF	First	one	Course-9	0.51	Took the exam
792	50	44	46	DC	First	one	Course-9	0.51	Not take the exam
793	50	44	46	DC	First	one	Course-9	0.51	Not take the exam
794	40	44	42	DC	First	one	Course-9	0.51	Took the exam
795	3	44	28	FF	First	one	Course-9	0.51	Not take the exam
796	20	32	27	FF	First	one	Course-9	0.51	Not take the exam
797	40	32	35	FF	First	one	Course-9	0.51	Not take the exam
798	5	28	19	FF	First	one	Course-9	0.51	Not take the exam
799	10	28	21	FF	First	one	Course-9	0.51	Not take the exam
800	40	36	38	FF	First	one	Course-9	0.51	Took the exam
801	0	0	0	FF	First	one	Course-9	0.51	Not take the exam
802	0	0	0	FF	First	one	Course-9	0.51	Not take the exam
803	0	0	0	FF	First	one	Course-9	0.51	Not take the exam
804	35	20	26	FF	First	one	Course-9	0.51	Took the exam
805	30	48	41	DD	First	one	Course-9	0.51	Not take the exam
806	45	0	18	FF	First	one	Course-9	0.51	Not take the exam
807	20	0	8	FF	Second	one	Course-9	0.54	Not take the exam
808	55	0	22	FF	Second	one	Course-9	0.54	Took the exam
809	23	28	26	FF	Second	one	Course-9	0.54	Not take the exam
810	45	0	18	FF	Second	one	Course-9	0.54	Not take the exam
811	100	24	54	FF	Second	one	Course-9	0.54	Took the exam
812	45	40	42	DC	Second	one	Course-9	0.54	Took the exam
813	20	20	20	FF	Second	one	Course-9	0.54	Not take the exam
814	30	0	12	FF	Second	one	Course-9	0.54	Not take the exam
815	30	0	12	FF	Second	one	Course-9	0.54	Not take the exam
816	48	36	41	DC	Second	one	Course-9	0.54	Took the exam
817	45	40	42	DC	Second	one	Course-9	0.54	Took the exam
818	0	0	0	FF	Second	one	Course-9	0.54	Not take the exam
819	55	28	39	FF	Second	one	Course-9	0.54	Took the exam
820	50	36	42	DC	Second	one	Course-9	0.54	Took the exam
821	25	0	10	FF	Second	one	Course-9	0.54	Not take the exam
822	48	24	34	FF	Second	one	Course-9	0.54	Not take the exam
823	5	52	33	FF	Second	one	Course-9	0.54	Not take the exam
824	15	44	32	FF	Second	one	Course-9	0.54	Took the exam
825	30	24	26	FF	Second	one	Course-9	0.54	Took the exam
826	5	48	31	FF	Second	one	Course-9	0.54	Not take the exam
827	45	40	42	DC	Second	one	Course-9	0.54	Took the exam
828	45	0	18	FF	Second	one	Course-9	0.54	Not take the exam
829	1	24	15	FF	Second	one	Course-9	0.54	Not take the exam
830	10	0	4	FF	Second	one	Course-9	0.54	Not take the exam
831	35	36	36	FF	Second	one	Course-9	0.54	Not take the exam
832	45	36	40	DC	Second	one	Course-9	0.54	Took the exam
833	30	44	38	FF	Second	one	Course-9	0.54	Not take the exam
834	35	32	33	FF	Second	one	Course-9	0.54	Not take the exam
835	5	32	21	FF	Second	one	Course-9	0.54	Not take the exam
836	53	32	40	DC	Second	one	Course-9	0.54	Took the exam
837	35	28	31	FF	Second	one	Course-9	0.54	Took the exam
838	50	32	39	FF	Second	one	Course-9	0.54	Not take the exam
839	15	40	30	FF	Second	one	Course-9	0.54	Took the exam
840	40	32	35	FF	Second	one	Course-9	0.54	Took the exam
841	20	32	27	FF	Second	one	Course-9	0.54	Took the exam
842	15	24	20	FF	Second	one	Course-9	0.54	Took the exam
843	5	32	21	FF	Second	one	Course-9	0.54	Not take the exam
844	5	32	21	FF	Second	one	Course-9	0.54	Took the exam
845	25	40	34	FF	Second	one	Course-9	0.54	Not take the exam
846	0	0	0	FF	Second	one	Course-9	0.54	Not take the exam
847	25	28	27	FF	Second	one	Course-9	0.54	Took the exam
848	10	0	4	FF	Second	one	Course-9	0.54	Not take the exam
849	40	36	38	FF	Second	one	Course-9	0.54	Not take the exam
850	30	36	34	FF	Second	one	Course-9	0.54	Took the exam
851	1	44	27	FF	Second	one	Course-9	0.54	Took the exam
852	33	44	40	DC	Second	one	Course-9	0.54	Not take the exam
853	35	40	38	FF	Second	one	Course-9	0.54	Took the exam
854	30	36	34	FF	Second	one	Course-9	0.54	Not take the exam
855	43	28	34	FF	Second	one	Course-9	0.54	Took the exam
856	45	24	32	FF	Second	one	Course-9	0.54	Not take the exam
857	1	16	10	FF	Second	one	Course-9	0.54	Not take the exam
858	50	28	37	FF	Second	one	Course-9	0.54	Not take the exam
859	35	32	33	FF	Second	one	Course-9	0.54	Took the exam
860	45	32	37	FF	Second	one	Course-9	0.54	Took the exam
861	30	48	41	DC	Second	one	Course-9	0.54	Not take the exam
862	30	32	31	FF	Second	one	Course-9	0.54	Took the exam
863	5	28	19	FF	Second	one	Course-9	0.54	Not take the exam
864	50	32	39	FF	Second	one	Course-9	0.54	Not take the exam
865	20	52	39	FF	Second	one	Course-9	0.54	Took the exam
866	60	32	43	DC	Second	one	Course-9	0.54	Not take the exam
867	60	32	43	DC	Second	one	Course-9	0.54	Not take the exam
868	20	32	27	FF	Second	one	Course-9	0.54	Took the exam
869	40	40	40	DC	Second	one	Course-9	0.54	Not take the exam
870	35	48	43	DC	Second	one	Course-9	0.54	Not take the exam
871	20	32	27	FF	Second	one	Course-9	0.54	Took the exam
872	0	0	0	FF	Second	one	Course-9	0.54	Not take the exam
873	0	0	0	FF	Second	one	Course-9	0.54	Not take the exam
874	30	24	26	FF	Second	one	Course-9	0.54	Not take the exam
875	35	40	38	FF	Second	one	Course-9	0.54	Took the exam
876	50	32	39	FF	Second	one	Course-9	0.54	Not take the exam
877	0	0	0	FF	Second	one	Course-9	0.54	Not take the exam
878	55	32	41	DC	Second	one	Course-9	0.54	Not take the exam
879	18	32	26	FF	Second	one	Course-9	0.54	Took the exam
880	20	20	20	FF	Second	one	Course-9	0.54	Not take the exam
881	20	48	37	FF	Second	one	Course-9	0.54	Not take the exam
882	25	48	39	FF	Second	one	Course-9	0.54	Not take the exam
883	40	24	30	FF	Second	one	Course-9	0.54	Took the exam
884	30	24	26	FF	Second	one	Course-9	0.54	Not take the exam
885	10	28	21	FF	Second	one	Course-9	0.54	Not take the exam
886	1	44	27	FF	Second	one	Course-9	0.54	Took the exam
887	40	36	38	FF	Second	one	Course-9	0.54	Took the exam
888	0	36	22	FF	Second	one	Course-9	0.54	Not take the exam
889	1	20	12	FF	Second	one	Course-9	0.54	Not take the exam
890	0	0	0	FF	Second	one	Course-9	0.54	Not take the exam
891	15	15	15	FF	First	two	Course-10	0.84	Took the exam
892	0	0	0	FF	First	two	Course-10	0.84	Not take the exam
893	15	15	15	FF	First	two	Course-10	0.84	Took the exam
894	15	15	15	FF	First	two	Course-10	0.84	Not take the exam
895	0	0	0	FF	First	two	Course-10	0.84	Not take the exam
896	35	35	35	FF	First	two	Course-10	0.84	Took the exam
897	41	18	27	FF	First	two	Course-10	0.84	Took the exam
898	0	0	0	FF	First	two	Course-10	0.84	Took the exam
899	40	20	28	FF	First	two	Course-10	0.84	Took the exam
900	17	40	31	FF	First	two	Course-10	0.84	Took the exam
901	18	15	16	FF	First	two	Course-10	0.84	Not take the exam
902	0	0	0	FF	First	two	Course-10	0.84	Not take the exam
903	20	18	19	FF	First	two	Course-10	0.84	Took the exam
904	20	25	23	FF	First	two	Course-10	0.84	Took the exam
905	15	0	6	FF	First	two	Course-10	0.84	Not take the exam
906	0	0	0	F	First	two	Course-10	0.84	Not take the exam
907	0	15	9	FF	First	two	Course-10	0.84	Took the exam
908	20	20	20	FF	First	two	Course-10	0.84	Took the exam
909	15	0	6	FF	First	two	Course-10	0.84	Not take the exam
910	0	0	0	FF	First	two	Course-10	0.84	Not take the exam
911	23	43	35	FF	First	two	Course-10	0.84	Took the exam
912	15	15	15	FF	First	two	Course-10	0.84	Took the exam
913	25	25	25	FF	First	two	Course-10	0.84	Took the exam
914	0	0	0	FF	First	two	Course-10	0.84	Took the exam
915	15	0	6	FF	First	two	Course-10	0.84	Not take the exam
916	0	0	0	F	First	two	Course-10	0.84	Not take the exam
917	35	40	38	FF	First	two	Course-10	0.84	Took the exam
918	15	20	18	FF	First	two	Course-10	0.84	Took the exam
919	26	32	30	FF	First	two	Course-10	0.84	Took the exam
920	25	20	22	FF	First	two	Course-10	0.84	Took the exam
921	15	35	27	FF	First	two	Course-10	0.84	Took the exam
922	18	0	7	FF	First	two	Course-10	0.84	Took the exam
923	23	43	35	FF	First	two	Course-10	0.84	Took the exam
924	18	15	16	FF	First	two	Course-10	0.84	Not take the exam
925	20	28	25	FF	First	two	Course-10	0.84	Took the exam
926	15	15	15	FF	First	two	Course-10	0.84	Took the exam
927	20	20	20	FF	First	two	Course-10	0.84	Not take the exam
928	25	20	22	FF	First	two	Course-10	0.84	Took the exam
929	15	0	6	FF	First	two	Course-10	0.84	Not take the exam
930	15	15	15	FF	First	two	Course-10	0.84	Not take the exam
931	15	20	18	FF	First	two	Course-10	0.84	Took the exam
932	18	15	16	FF	First	two	Course-10	0.84	Took the exam
933	20	18	19	FF	First	two	Course-10	0.84	Took the exam
934	15	15	15	FF	First	two	Course-10	0.84	Not take the exam
935	23	33	29	FF	First	two	Course-10	0.84	Took the exam
936	15	0	6	FF	First	two	Course-10	0.84	Not take the exam
937	20	18	19	FF	First	two	Course-10	0.84	Not take the exam
938	18	20	19	FF	First	two	Course-10	0.84	Took the exam
939	15	15	15	FF	First	two	Course-10	0.84	Not take the exam
940	18	15	16	FF	First	two	Course-10	0.84	Took the exam
941	15	0	6	FF	First	two	Course-10	0.84	Not take the exam
942	30	15	21	FF	First	two	Course-10	0.84	Took the exam
943	25	18	21	FF	First	two	Course-10	0.84	Not take the exam
944	15	0	6	FF	First	two	Course-10	0.84	Not take the exam
945	15	0	0	F	First	two	Course-10	0.84	Not take the exam
946	20	40	32	FF	First	two	Course-10	0.84	Took the exam
947	15	35	27	FF	First	two	Course-10	0.84	Took the exam
948	0	0	0	F	First	two	Course-10	0.84	Not take the exam
949	23	15	18	FF	First	two	Course-10	0.84	Not take the exam
950	15	23	20	FF	First	two	Course-10	0.84	Not take the exam
951	25	45	37	FF	First	two	Course-10	0.84	Took the exam
952	15	0	6	FF	First	two	Course-10	0.84	Not take the exam
953	15	0	6	FF	First	two	Course-10	0.84	Not take the exam
954	46	30	36	FF	First	two	Course-10	0.84	Took the exam
955	28	20	23	FF	First	two	Course-10	0.84	Took the exam
956	25	20	22	FF	First	two	Course-10	0.84	Took the exam
957	22	0	9	FF	First	two	Course-10	0.84	Took the exam
958	15	0	6	FF	First	two	Course-10	0.84	Not take the exam
959	23	15	18	FF	First	two	Course-10	0.84	Not take the exam
960	15	0	0	F	First	two	Course-10	0.84	Not take the exam
961	15	15	15	FF	First	two	Course-10	0.84	Not take the exam
962	20	15	17	FF	First	two	Course-10	0.84	Not take the exam
963	15	0	6	FF	First	two	Course-10	0.84	Not take the exam
964	25	45	37	FF	First	two	Course-10	0.84	Took the exam
965	35	15	23	FF	First	two	Course-10	0.84	Took the exam
966	28	35	32	FF	First	two	Course-10	0.84	Not take the exam
967	20	0	8	FF	First	two	Course-10	0.84	Not take the exam
968	15	15	15	FF	First	two	Course-10	0.84	Not take the exam
969	15	0	6	FF	First	two	Course-10	0.84	Not take the exam
970	45	33	38	FF	First	two	Course-10	0.84	Not take the exam
971	15	0	6	FF	First	two	Course-10	0.84	Not take the exam
972	0	0	0	FF	First	two	Course-10	0.84	Not take the exam
973	20	20	20	FF	First	two	Course-10	0.84	Not take the exam
974	15	0	6	FF	First	two	Course-10	0.84	Not take the exam
975	38	28	32	FF	First	two	Course-10	0.84	Not take the exam
976	25	15	19	FF	First	two	Course-10	0.84	Took the exam
977	21	30	26	FF	First	two	Course-10	0.84	Took the exam
978	42	30	35	FF	First	two	Course-10	0.84	Took the exam
979	15	0	6	FF	First	two	Course-10	0.84	Not take the exam
980	20	35	29	FF	First	two	Course-10	0.84	Took the exam
981	15	15	15	FF	First	two	Course-10	0.84	Took the exam
982	25	40	34	FF	First	two	Course-10	0.84	Took the exam
983	20	15	17	FF	First	two	Course-10	0.84	Not take the exam
984	28	15	20	FF	First	two	Course-10	0.84	Not take the exam
985	25	0	10	FF	First	two	Course-10	0.84	Not take the exam
986	35	25	29	FF	First	two	Course-10	0.84	Not take the exam
987	25	21	23	FF	First	two	Course-10	0.84	Took the exam
988	0	0	0	FF	First	two	Course-10	0.84	Not take the exam
989	20	15	17	FF	First	two	Course-10	0.84	Took the exam
990	43	26	33	FF	First	two	Course-10	0.84	Took the exam
991	20	15	17	FF	First	two	Course-10	0.84	Took the exam
992	0	0	0	FF	First	two	Course-10	0.84	Not take the exam
993	15	0	6	FF	First	two	Course-10	0.84	Took the exam
994	23	18	20	FF	First	two	Course-10	0.84	Took the exam
995	25	15	19	FF	First	two	Course-10	0.84	Took the exam
996	0	0	0	FF	First	two	Course-10	0.84	Not take the exam
997	15	15	15	FF	First	two	Course-10	0.84	Took the exam
998	0	0	0	FF	First	two	Course-10	0.84	Not take the exam
999	18	15	16	FF	First	two	Course-10	0.84	Not take the exam
1000	18	20	19	FF	First	two	Course-10	0.84	Took the exam
1001	45	33	38	FF	First	two	Course-10	0.84	Took the exam
1002	23	0	9	FF	First	two	Course-10	0.84	Not take the exam
1003	18	0	7	FF	Second	two	Course-10	0.97	Not take the exam
1004	15	0	6	FF	Second	two	Course-10	0.97	Not take the exam
1005	23	15	18	FF	Second	two	Course-10	0.97	Took the exam
1006	0	0	0	F	Second	two	Course-10	0.97	Not take the exam
1007	0	0	0	FF	Second	two	Course-10	0.97	Not take the exam
1008	15	15	15	FF	Second	two	Course-10	0.97	Took the exam
1009	0	0	0	FF	Second	two	Course-10	0.97	Not take the exam
1010	15	0	6	FF	Second	two	Course-10	0.97	Not take the exam
1011	18	0	7	FF	Second	two	Course-10	0.97	Not take the exam
1012	20	15	17	FF	Second	two	Course-10	0.97	Not take the exam
1013	28	0	11	FF	Second	two	Course-10	0.97	Took the exam
1014	15	15	15	FF	Second	two	Course-10	0.97	Took the exam
1015	15	0	6	FF	Second	two	Course-10	0.97	Not take the exam
1016	0	0	0	FF	Second	two	Course-10	0.97	Not take the exam
1017	25	0	10	FF	Second	two	Course-10	0.97	Not take the exam
1018	22	0	9	FF	Second	two	Course-10	0.97	Not take the exam
1019	22	15	18	FF	Second	two	Course-10	0.97	Not take the exam
1020	18	25	22	FF	Second	two	Course-10	0.97	Took the exam
1021	0	0	0	F	Second	two	Course-10	0.97	Not take the exam
1022	0	0	0	FF	Second	two	Course-10	0.97	Not take the exam
1023	20	15	17	FF	Second	two	Course-10	0.97	Took the exam
1024	15	15	15	FF	Second	two	Course-10	0.97	Not take the exam
1025	15	0	6	FF	Second	two	Course-10	0.97	Took the exam
1026	15	15	15	FF	Second	two	Course-10	0.97	Not take the exam
1027	33	15	22	FF	Second	two	Course-10	0.97	Took the exam
1028	23	0	0	F	Second	two	Course-10	0.97	Not take the exam
1029	22	0	9	FF	Second	two	Course-10	0.97	Not take the exam
1030	15	0	6	FF	Second	two	Course-10	0.97	Not take the exam
1031	15	20	18	FF	Second	two	Course-10	0.97	Took the exam
1032	15	0	6	FF	Second	two	Course-10	0.97	Not take the exam
1033	20	0	8	FF	Second	two	Course-10	0.97	Not take the exam
1034	40	0	0	F	Second	two	Course-10	0.97	Not take the exam
1035	0	0	0	FF	Second	two	Course-10	0.97	Not take the exam
1036	25	0	0	F	Second	two	Course-10	0.97	Not take the exam
1037	28	15	20	FF	Second	two	Course-10	0.97	Took the exam
1038	18	20	19	FF	Second	two	Course-10	0.97	Not take the exam
1039	20	0	8	FF	Second	two	Course-10	0.97	Not take the exam
1040	0	0	0	FF	Second	two	Course-10	0.97	Not take the exam
1041	20	0	8	FF	Second	two	Course-10	0.97	Not take the exam
1042	25	15	19	FF	Second	two	Course-10	0.97	Took the exam
1043	22	20	21	FF	Second	two	Course-10	0.97	Took the exam
1044	15	15	15	FF	Second	two	Course-10	0.97	Took the exam
1045	0	0	0	FF	Second	two	Course-10	0.97	Not take the exam
1046	15	15	15	FF	Second	two	Course-10	0.97	Took the exam
1047	18	15	16	FF	Second	two	Course-10	0.97	Not take the exam
1048	20	0	8	FF	Second	two	Course-10	0.97	Not take the exam
1049	15	0	6	FF	Second	two	Course-10	0.97	Not take the exam
1050	45	20	30	FF	Second	two	Course-10	0.97	Took the exam
1051	20	30	26	FF	Second	two	Course-10	0.97	Took the exam
1052	28	35	32	FF	Second	two	Course-10	0.97	Took the exam
1053	20	15	17	FF	Second	two	Course-10	0.97	Took the exam
1054	0	0	0	FF	Second	two	Course-10	0.97	Not take the exam
1055	15	15	15	FF	Second	two	Course-10	0.97	Took the exam
1056	0	0	0	FF	Second	two	Course-10	0.97	Not take the exam
1057	25	15	19	FF	Second	two	Course-10	0.97	Took the exam
1058	15	15	15	FF	Second	two	Course-10	0.97	Not take the exam
1059	20	15	17	FF	Second	two	Course-10	0.97	Took the exam
1060	30	18	23	FF	Second	two	Course-10	0.97	Not take the exam
1061	15	15	15	FF	Second	two	Course-10	0.97	Took the exam
1062	35	30	32	FF	Second	two	Course-10	0.97	Took the exam
1063	45	25	33	FF	Second	two	Course-10	0.97	Took the exam
1064	15	0	6	FF	Second	two	Course-10	0.97	Not take the exam
1065	15	15	15	FF	Second	two	Course-10	0.97	Not take the exam
1066	20	15	17	FF	Second	two	Course-10	0.97	Not take the exam
1067	15	0	6	FF	Second	two	Course-10	0.97	Not take the exam
1068	15	0	6	FF	Second	two	Course-10	0.97	Not take the exam
1069	15	15	15	FF	Second	two	Course-10	0.97	Not take the exam
1070	0	0	0	FF	Second	two	Course-10	0.97	Not take the exam
1071	0	0	0	FF	Second	two	Course-10	0.97	Not take the exam
1072	0	0	0	FF	Second	two	Course-10	0.97	Not take the exam
1073	25	15	19	FF	Second	two	Course-10	0.97	Not take the exam
1074	15	0	6	FF	Second	two	Course-10	0.97	Not take the exam
1075	40	15	25	FF	Second	two	Course-10	0.97	Took the exam
1076	15	0	6	FF	Second	two	Course-10	0.97	Not take the exam
1077	15	0	6	FF	Second	two	Course-10	0.97	Not take the exam
1078	32	15	22	FF	Second	two	Course-10	0.97	Took the exam
1079	0	0	0	FF	Second	two	Course-10	0.97	Not take the exam
1080	20	18	19	FF	Second	two	Course-10	0.97	Not take the exam
1081	0	0	0	F	Second	two	Course-10	0.97	Not take the exam
1082	20	15	17	FF	Second	two	Course-10	0.97	Took the exam
1083	0	0	0	F	Second	two	Course-10	0.97	Not take the exam
1084	21	30	26	FF	Second	two	Course-10	0.97	Took the exam
1085	0	0	0	F	Second	two	Course-10	0.97	Not take the exam
1086	0	0	0	FF	Second	two	Course-10	0.97	Not take the exam
1087	15	0	6	FF	Second	two	Course-10	0.97	Not take the exam
1088	15	0	6	FF	Second	two	Course-10	0.97	Took the exam
1089	28	20	23	FF	Second	two	Course-10	0.97	Not take the exam
1090	25	33	30	FF	Second	two	Course-10	0.97	Took the exam
1091	0	0	0	FF	Second	two	Course-10	0.97	Not take the exam
1092	0	0	0	FF	Second	two	Course-10	0.97	Not take the exam
1093	15	0	6	FF	Second	two	Course-10	0.97	Not take the exam
1094	20	15	17	FF	Second	two	Course-10	0.97	Not take the exam
1095	15	0	0	F	Second	two	Course-10	0.97	Not take the exam
1096	15	15	15	FF	Second	two	Course-10	0.97	Took the exam
1097	15	0	6	FF	Second	two	Course-10	0.97	Not take the exam
1098	23	15	18	FF	Second	two	Course-10	0.97	Not take the exam
1099	0	0	0	F	Second	two	Course-10	0.97	Not take the exam
1100	15	15	15	FF	Second	two	Course-10	0.97	Not take the exam
1101	15	0	6	FF	Second	two	Course-10	0.97	Not take the exam
1102	25	25	25	FF	Second	two	Course-10	0.97	Took the exam
1103	15	0	0	F	Second	two	Course-10	0.97	Not take the exam
1104	15	15	15	FF	Second	two	Course-10	0.97	Took the exam
1105	0	0	0	FF	Second	two	Course-10	0.97	Not take the exam
1106	15	0	6	FF	Second	two	Course-10	0.97	Not take the exam
1107	25	15	19	FF	Second	two	Course-10	0.97	Not take the exam
1108	15	0	0	F	Second	two	Course-10	0.97	Not take the exam
1109	23	0	9	FF	Second	two	Course-10	0.97	Not take the exam
1110	25	30	28	FF	Second	two	Course-10	0.97	Took the exam
1111	15	15	15	FF	Second	two	Course-10	0.97	Not take the exam
1112	35	30	32	FF	Second	two	Course-10	0.97	Took the exam
1113	23	15	18	FF	Second	two	Course-10	0.97	Not take the exam
1114	15	15	15	FF	Second	two	Course-10	0.97	Took the exam
1115	23	15	18	FF	Second	two	Course-10	0.97	Took the exam
1116	15	0	6	FF	Second	two	Course-10	0.97	Not take the exam
1117	15	15	15	FF	Second	two	Course-10	0.97	Not take the exam
1118	15	15	15	FF	Second	two	Course-10	0.97	Not take the exam
1119	15	0	6	FF	Second	two	Course-10	0.97	Took the exam
1120	43	21	30	FF	Second	two	Course-10	0.97	Took the exam
1121	20	15	17	FF	Second	two	Course-10	0.97	Took the exam
1122	20	0	8	FF	Second	two	Course-10	0.97	Not take the exam
1123	25	15	19	FF	Second	two	Course-10	0.97	Took the exam
1124	15	0	6	FF	Second	two	Course-10	0.97	Not take the exam
1125	22	15	18	FF	Second	two	Course-10	0.97	Took the exam
1126	42	25	32	FF	Second	two	Course-10	0.97	Took the exam
1127	15	0	6	FF	Second	two	Course-10	0.97	Not take the exam
1128	23	0	9	FF	Second	two	Course-10	0.97	Not take the exam
1129	15	0	6	FF	Second	two	Course-10	0.97	Not take the exam
1130	15	0	6	FF	Second	two	Course-10	0.97	Not take the exam
1131	0	0	0	F	Second	two	Course-10	0.97	Not take the exam
1132	15	15	15	FF	Second	two	Course-10	0.97	Took the exam
1133	0	0	0	FF	Second	two	Course-10	0.97	Not take the exam
1134	20	0	8	FF	Second	two	Course-10	0.97	Not take the exam
1135	23	15	18	FF	Second	two	Course-10	0.97	Not take the exam
1136	15	0	6	FF	Second	two	Course-10	0.97	Not take the exam
1137	0	0	0	F	Second	two	Course-10	0.97	Not take the exam
1138	15	0	6	FF	Second	two	Course-10	0.97	Not take the exam
1139	15	15	15	FF	Second	two	Course-10	0.97	Not take the exam
1140	15	0	6	FF	Second	two	Course-10	0.97	Not take the exam
1141	15	15	15	FF	Second	two	Course-10	0.97	Not take the exam
1142	0	0	0	FF	Second	two	Course-10	0.97	Not take the exam
1143	0	0	0	FF	Second	two	Course-10	0.97	Not take the exam
1144	20	35	29	FF	Second	two	Course-10	0.97	Took the exam
1145	35	15	23	FF	Second	two	Course-10	0.97	Took the exam
1146	25	20	22	FF	Second	two	Course-10	0.97	Not take the exam
1147	15	0	6	FF	Second	two	Course-10	0.97	Not take the exam
1148	15	18	17	FF	Second	two	Course-10	0.97	Not take the exam
1149	20	20	20	FF	Second	two	Course-10	0.97	Took the exam
1150	28	0	11	FF	First	four	Course-11	0.39	Took the exam
1151	15	0	6	FF	First	four	Course-11	0.39	Not take the exam
1152	61	45	51	DC	First	four	Course-11	0.39	Took the exam
1153	10	0	4	FF	First	four	Course-11	0.39	Not take the exam
1154	20	20	20	FF	First	four	Course-11	0.39	Took the exam
1155	37	40	39	FF	First	four	Course-11	0.39	Took the exam
1156	58	10	29	FF	First	four	Course-11	0.39	Took the exam
1157	30	35	33	FF	First	four	Course-11	0.39	Took the exam
1158	30	35	33	FF	First	four	Course-11	0.39	Took the exam
1159	70	38	51	DC	First	four	Course-11	0.39	Not take the exam
1160	10	5	7	FF	First	four	Course-11	0.39	Not take the exam
1161	18	65	46	DD	First	four	Course-11	0.39	Not take the exam
1162	35	23	28	FF	First	four	Course-11	0.39	Took the exam
1163	10	70	46	DD	First	four	Course-11	0.39	Not take the exam
1164	90	20	48	FF	First	four	Course-11	0.39	Took the exam
1165	80	30	50	DC	First	four	Course-11	0.39	Not take the exam
1166	55	10	28	FF	First	four	Course-11	0.39	Took the exam
1167	65	43	52	DC	First	four	Course-11	0.39	Not take the exam
1168	30	33	32	FF	First	four	Course-11	0.39	Took the exam
1169	75	15	39	FF	First	four	Course-11	0.39	Took the exam
1170	62	5	28	FF	First	four	Course-11	0.39	Took the exam
1171	50	55	53	DC	First	four	Course-11	0.39	Not take the exam
1172	10	0	4	FF	First	four	Course-11	0.39	Not take the exam
1173	15	5	9	FF	Second	four	Course-11	0.36	Not take the exam
1174	30	40	36	FF	Second	four	Course-11	0.36	Took the exam
1175	45	25	33	FF	Second	four	Course-11	0.36	Took the exam
1176	25	13	18	FF	Second	four	Course-11	0.36	Took the exam
1177	55	5	25	FF	Second	four	Course-11	0.36	Took the exam
1178	40	30	34	FF	Second	four	Course-11	0.36	Took the exam
1179	85	0	34	FF	Second	four	Course-11	0.36	Not take the exam
1180	40	30	34	FF	Second	four	Course-11	0.36	Took the exam
1181	15	0	6	FF	Second	four	Course-11	0.36	Not take the exam
1182	75	15	39	FF	Second	four	Course-11	0.36	Took the exam
1183	5	0	2	FF	Second	four	Course-11	0.36	Not take the exam
1184	73	25	44	FF	Second	four	Course-11	0.36	Took the exam
1185	50	45	47	DD	Second	four	Course-11	0.36	Took the exam
1186	53	35	42	FF	Second	four	Course-11	0.36	Took the exam
1187	25	15	19	FF	Second	four	Course-11	0.36	Took the exam
1188	45	20	30	FF	Second	four	Course-11	0.36	Took the exam
1189	25	35	31	FF	Second	four	Course-11	0.36	Took the exam
1190	60	50	54	DC	Second	four	Course-11	0.36	Not take the exam
1191	40	10	22	FF	Second	four	Course-11	0.36	Took the exam
1192	25	0	10	FF	Second	four	Course-11	0.36	Not take the exam
1193	55	10	28	FF	Second	four	Course-11	0.36	Took the exam
1194	53	30	39	FF	Second	four	Course-11	0.36	Took the exam
1195	48	10	25	FF	Second	four	Course-11	0.36	Took the exam
